# Supplementary material for: Constraining global aerosol emissions using POLDER/PARASOLsatellite remote sensing observations
Source: Copernicus journal article supplement (doi:10.5194/acp-2019-623), 2019-07-15
Supplement: Supplementary file 1 [file acp-2019-623-supplement.pdf]

## Supplementary materials

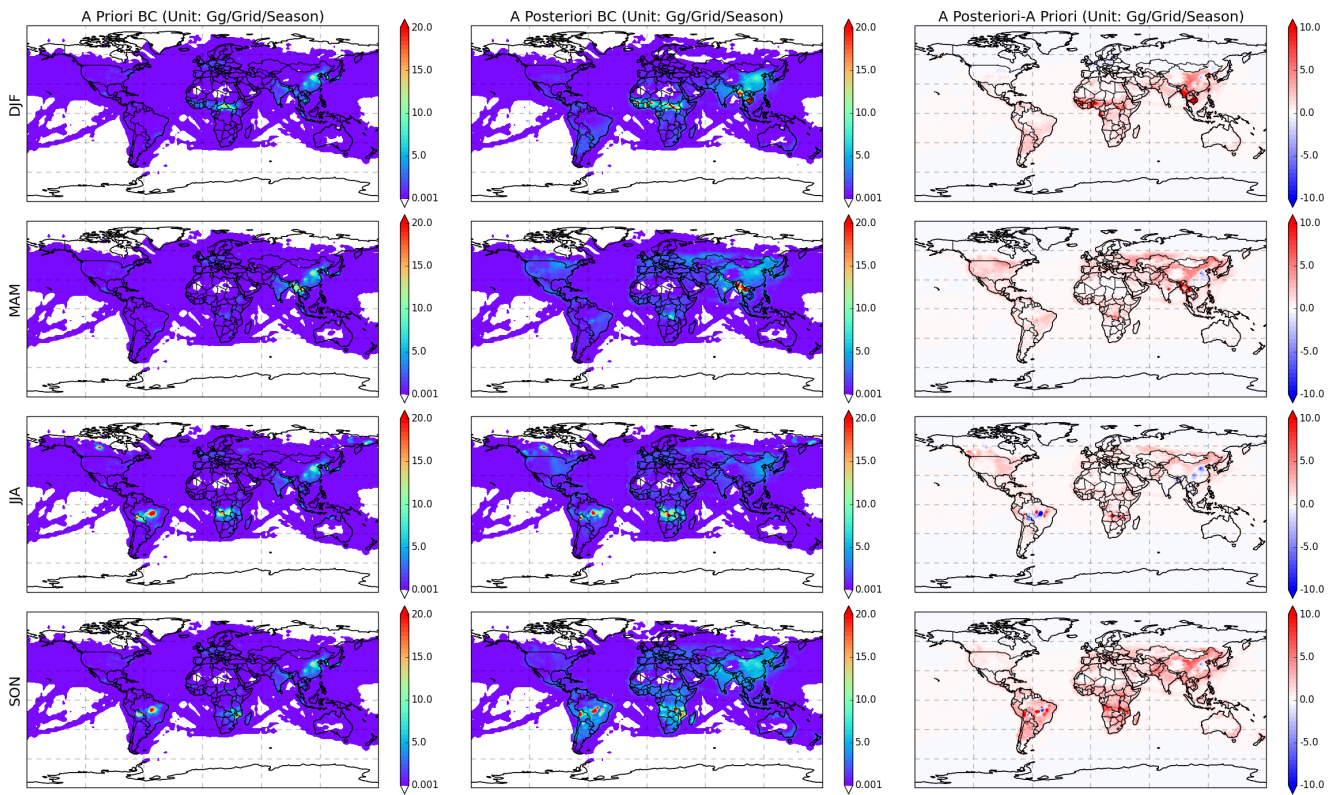

Figure S1. Global distribution of seasonal BC emission flux in year 2010 from a priori (left) and a posteriori (middle) emission datasets, and the difference between a posteriori and a priori emissions (right)

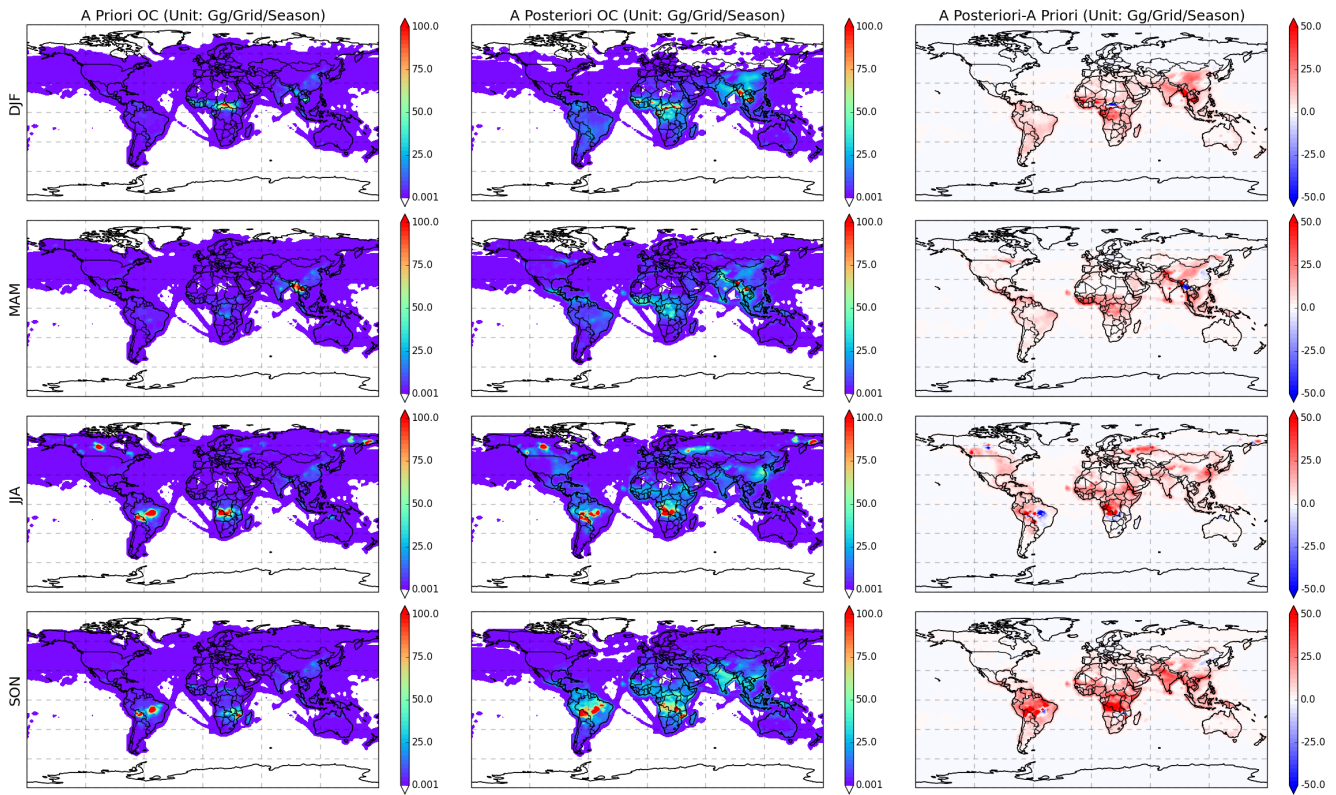

Figure S2. Same as Figure S1, but for OC

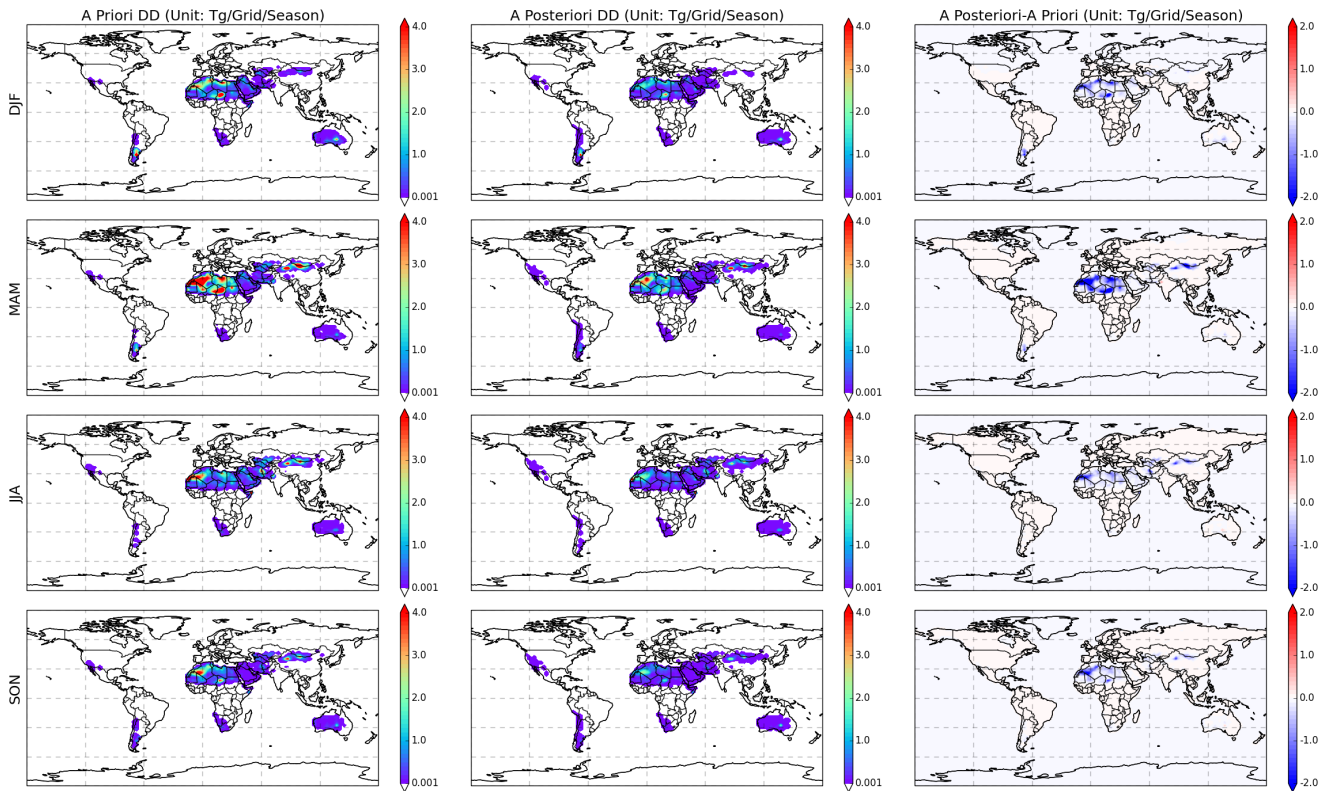

5

Figure S3. Same as Figure S1, but for DD
